# Supplementary material for: Cumulative Kidney Complication Risk by 50 Years of Type 1 Diabetes: The Effects of Sex, Age, and Calendar Year at Onset
Source: Oxford University Press journal article supplement (doi:10.2337/dc17-1118), 2017-09-20
Supplement: dc171118supplementarydata.pdf [file dc171118supplementarydata.pdf]

SUPPLEMENTARY DATA

**Supplementary Table 1. The 25-year cumulative incidence of microalbuminuria, macroalbuminuria, ESRD and ESRD/Mortality by duration of diabetes, diagnosis cohort, gender and age at diabetes onset**

| Diagnosis                          | Microalbuminuria |                 |         | Macroalbuminuria |                 |         | ESRD            |                 |         | ESRD/Mortality  |                 |         |
|------------------------------------|------------------|-----------------|---------|------------------|-----------------|---------|-----------------|-----------------|---------|-----------------|-----------------|---------|
|                                    | 1950-64          | 1965-80         | p-value | 1950-64          | 1965-80         | p-value | 1950-64         | 1965-80         | p-value | 1950-64         | 1965-80         | p-value |
| <b>20 years' diabetes duration</b> |                  |                 |         |                  |                 |         |                 |                 |         |                 |                 |         |
| Men                                |                  |                 |         |                  |                 |         |                 |                 |         |                 |                 |         |
| AON (yrs)                          |                  |                 |         |                  |                 |         |                 |                 |         |                 |                 |         |
| <6                                 | --               | 45.3<br>(29/64) |         | --               | 10.8<br>(7/65)  |         | 11.0<br>(8/73)  | 0.0             | 0.003   | 20.2<br>(16/79) | 2.6<br>(2/77)   | 0.0006  |
| 6 – 11/12                          | --               | 61.0<br>(50/82) |         | --               | 31.2<br>(25/80) |         | 17.4<br>(15/86) | 4.0<br>(4/100)  | 0.002   | 26.9<br>(25/93) | 8.7<br>(9/103)  | 0.0008  |
| ≥ 11/12                            |                  | 56.0<br>(28/50) |         |                  | 28.6<br>(14/49) |         | 27.8<br>(10/36) | 11.1<br>(7/63)  | 0.03    | 35.9<br>(14/39) | 15.6<br>(10/64) | 0.02    |
| p-value <sub>AON</sub>             |                  | 0.16            |         |                  | 0.01            |         | 0.09            | 0.006           |         | 0.19            | 0.02            |         |
| Women                              |                  |                 |         |                  |                 |         |                 |                 |         |                 |                 |         |
| AON (yrs)                          |                  |                 |         |                  |                 |         |                 |                 |         |                 |                 |         |
| <6                                 | --               | 41.9<br>(18/43) |         | --               | 13.6<br>(6/44)  |         | 2.2<br>(1/45)   | 1.6<br>(1/64)   | 1.00    | 16.7<br>(8/48)  | 2.9<br>(2/68)   | 0.009   |
| 6 – 11/12                          | --               | 63.9<br>(55/86) |         | --               | 36.1<br>(30/83) |         | 14.3<br>(12/84) | 7.5<br>(8/107)  | 0.13    | 24.1<br>(21/87) | 7.21<br>(8/111) | 0.0008  |
| ≥ 11/12                            |                  | 51.5<br>(35/68) |         |                  | 34.3<br>(23/67) |         | 16.7<br>(7/42)  | 8.6<br>(7/81)   | 0.23    | 22.7<br>(10/44) | 11.0<br>(9/82)  | 0.08    |
| p-value <sub>AON</sub>             |                  | 0.05            |         |                  | 0.02            |         | 0.07            | 0.16            |         | 0.59            | 0.17            |         |
| p-value <sup>*</sup>               |                  | 0.72            |         |                  | 0.65            |         | 0.15            | 0.46            |         | 0.62            | 1.00            |         |
| p-value <sup>†</sup>               |                  | 0.69            |         |                  | 0.51            |         | 0.57            | 0.28            |         | 0.67            | 0.68            |         |
| p-value <sup>‡</sup>               |                  | 0.63            |         |                  | 0.51            |         | 0.24            | 0.62            |         | 0.19            | 0.41            |         |
| <b>30 years' diabetes duration</b> |                  |                 |         |                  |                 |         |                 |                 |         |                 |                 |         |
| Men                                |                  |                 |         |                  |                 |         |                 |                 |         |                 |                 |         |
| AON (yrs)                          |                  |                 |         |                  |                 |         |                 |                 |         |                 |                 |         |
| <6                                 | 61.0<br>(25/41)  | 67.2<br>(39/58) | 0.52    | 41.9<br>(18/43)  | 21.7<br>(10/46) | 0.04    | 27.3<br>(18/66) | 1.6<br>(1/64)   | <0.0001 | 41.0<br>(32/78) | 12.7<br>(9/71)  | 0.0001  |
| 6 – 11/12                          | 82.9<br>(34/41)  | 71.2<br>(57/80) | 0.16    | 60.9<br>(28/46)  | 46.6<br>(34/73) | 0.13    | 44.7<br>(34/76) | 14.9<br>(13/87) | <0.0001 | 55.9<br>(52/93) | 23.7<br>(23/97) | <0.0001 |
| ≥ 11/12                            | 76.9<br>(10/13)  | 69.8<br>(30/43) | 0.74    | 71.4<br>(10/14)  | 47.4<br>(18/38) | 0.12    | 53.1<br>(17/32) | 17.0<br>(9/53)  | 0.0005  | 59.0<br>(23/39) | 25.4<br>(15/59) | 0.0008  |

SUPPLEMENTARY DATA

| Diagnosis                          | Microalbuminuria |                 |         | Macroalbuminuria |                 |         | ESRD            |                 |         | ESRD/Mortality  |                  |         |
|------------------------------------|------------------|-----------------|---------|------------------|-----------------|---------|-----------------|-----------------|---------|-----------------|------------------|---------|
|                                    | 1950-64          | 1965-80         | p-value | 1950-64          | 1965-80         | p-value | 1950-64         | 1965-80         | p-value | 1950-64         | 1965-80          | p-value |
| p-value <sub>AON</sub>             | 0.07             | 0.88            |         | 0.08             | 0.01            |         | 0.02            | 0.01            |         | 0.08            | 0.13             |         |
| <b>Women</b>                       |                  |                 |         |                  |                 |         |                 |                 |         |                 |                  |         |
| AON (yrs)                          |                  |                 |         |                  |                 |         |                 |                 |         |                 |                  |         |
| <6                                 | 56.0<br>(14/25)  | 61.9<br>(26/42) | 0.63    | 29.6<br>(8/27)   | 24.3<br>(9/37)  | 0.64    | 23.7<br>(9/38)  | 8.5<br>(5/59)   | 0.04    | 37.5<br>(18/48) | 14.1<br>(9/64)   | 0.004   |
| 6 – 11/12                          | 56.8<br>(25/44)  | 80.3<br>(61/76) | 0.006   | 29.2<br>(14/48)  | 50.0<br>(33/66) | 0.03    | 28.6<br>(20/70) | 20.2<br>(20/99) | 0.21    | 44.2<br>(38/86) | 25.0<br>(26/104) | 0.005   |
| ≥ 11/12                            | 60.9<br>(14/23)  | 64.1<br>(41/64) | 0.79    | 39.1<br>(9/23)   | 39.7<br>(23/58) | 0.97    | 33.3<br>(13/39) | 20.5<br>(15/73) | 0.14    | 43.2<br>(19/44) | 27.8<br>(22/79)  | 0.08    |
| p-value <sub>AON</sub>             | 0.93             | 0.04            |         | 0.68             | 0.04            |         | 0.64            | 0.11            |         | 0.74            | 0.12             |         |
| p-value <sup>*</sup>               | 0.69             | 0.58            |         | 0.30             | 0.78            |         | 0.69            | 0.10            |         | 0.69            | 0.81             |         |
| p-value <sup>†</sup>               | 0.009            | 0.19            |         | 0.002            | 0.69            |         | 0.04            | 0.35            |         | 0.12            | 0.83             |         |
| p-value <sup>‡</sup>               | 0.47             | 0.54            |         | 0.06             | 0.45            |         | 0.09            | 0.61            |         | 0.15            | 0.75             |         |
| <b>40 years' diabetes duration</b> |                  |                 |         |                  |                 |         |                 |                 |         |                 |                  |         |
| <b>Men</b>                         |                  |                 |         |                  |                 |         |                 |                 |         |                 |                  |         |
| AON (yrs)                          |                  |                 |         |                  |                 |         |                 |                 |         |                 |                  |         |
| <6                                 | 73.5<br>(36/49)  | 85.7<br>(36/42) | 0.15    | 58.7<br>(27/46)  | 53.8<br>(14/26) | 0.69    | 46.0<br>(29/63) | 12.8<br>(5/39)  | 0.0005  | 56.4<br>(44/78) | 26.1<br>(12/46)  | 0.001   |
| 6 – 11/12                          | 87.5<br>(42/48)  | 83.3<br>(40/48) | 0.56    | 73.9<br>(34/46)  | 66.7<br>(26/39) | 0.47    | 56.3<br>(40/71) | 33.3<br>(15/45) | 0.02    | 65.6<br>(61/93) | 46.3<br>(25/54)  | 0.02    |
| ≥ 11/12                            | 92.9<br>(13/14)  | 80.0<br>(24/70) | 0.40    | 76.9<br>(10/13)  | 60.0<br>(15/25) | 0.47    | 65.5<br>(19/29) | 32.1<br>(9/28)  | 0.01    | 71.0<br>(27/38) | 52.6<br>(20/38)  | 0.10    |
| p-value <sub>AON</sub>             | 0.12             | 0.81            |         | 0.25             | 0.58            |         | 0.19            | 0.07            |         | 0.25            | 0.03             |         |
| <b>Women</b>                       |                  |                 |         |                  |                 |         |                 |                 |         |                 |                  |         |
| AON (yrs)                          |                  |                 |         |                  |                 |         |                 |                 |         |                 |                  |         |
| <6                                 | 73.3<br>(22/30)  | 75.0<br>(21/28) | 0.88    | 42.9<br>(12/28)  | 38.1<br>(8/21)  | 0.74    | 35.1<br>(13/37) | 11.1<br>(4/36)  | 0.02    | 50.0<br>(24/48) | 22.5<br>(9/40)   | 0.008   |
| 6 – 11/12                          | 79.6<br>(39/49)  | 91.3<br>(42/46) | 0.11    | 40.9<br>(18/44)  | 66.7<br>(24/36) | 0.02    | 41.3<br>(26/63) | 32.0<br>(16/50) | 0.31    | 55.8<br>(48/86) | 39.3<br>(22/56)  | 0.05    |
| ≥ 11/12                            | 70.8<br>(17/24)  | 69.4<br>(25/36) | 0.91    | 57.1<br>(12/21)  | 48.4<br>(15/31) | 0.54    | 50.0<br>(18/36) | 36.1<br>(13/36) | 0.23    | 63.6<br>(28/44) | 47.6<br>(20/42)  | 0.13    |
| p-value <sub>AON</sub>             | 0.67             | 0.04            |         | 0.45             | 0.09            |         | 0.43            | 0.03            |         | 0.42            | 0.06             |         |
| p-value <sup>*</sup>               | 0.99             | 0.26            |         | 0.19             | 0.28            |         | 0.29            | 1.00            |         | 0.48            | 0.70             |         |

SUPPLEMENTARY DATA

| Diagnosis                          | Microalbuminuria |         |         | Macroalbuminuria |         |         | ESRD            |         |         | ESRD/Mortality  |         |         |
|------------------------------------|------------------|---------|---------|------------------|---------|---------|-----------------|---------|---------|-----------------|---------|---------|
|                                    | 1950-64          | 1965-80 | p-value | 1950-64          | 1965-80 | p-value | 1950-64         | 1965-80 | p-value | 1950-64         | 1965-80 | p-value |
| p-value <sup>†</sup>               | 0.29             | 0.25    |         | 0.001            | 1.00    |         | 0.08            | 0.89    |         | 0.18            | 0.46    |         |
| p-value <sup>‡</sup>               | 0.22             | 0.33    |         | 0.29             | 0.39    |         | 0.21            | 0.74    |         | 0.48            | 0.65    |         |
| <b>50 years' diabetes duration</b> |                  |         |         |                  |         |         |                 |         |         |                 |         |         |
| Men                                |                  |         |         |                  |         |         |                 |         |         |                 |         |         |
| AON (yrs)                          |                  |         |         |                  |         |         |                 |         |         |                 |         |         |
| <6                                 | 83.0<br>(39/47)  | --      |         | 69.2<br>(27/39)  | --      |         | 57.6<br>(34/59) | --      |         | 71.4<br>(55/77) | --      |         |
| 6 – 11/12                          | 93.6<br>(44/47)  | --      |         | 83.3<br>(35/42)  | --      |         | 69.3<br>(43/62) | --      |         | 80.9<br>(72/89) | --      |         |
| ≥ 11/12                            | 100.0<br>(13/13) |         |         | 100.0<br>(10/10) |         |         | 78.6<br>(22/28) |         |         | 86.1<br>(31/36) |         |         |
| p-value <sub>AON</sub>             | 0.14             |         |         | 0.08             |         |         | 0.13            |         |         | 0.15            |         |         |
| Women                              |                  |         |         |                  |         |         |                 |         |         |                 |         |         |
| AON (yrs)                          |                  |         |         |                  |         |         |                 |         |         |                 |         |         |
| <6                                 | 82.1<br>(23/28)  | --      |         | 59.1<br>(13/22)  | --      |         | 45.7<br>(16/35) | --      |         | 63.8<br>(30/47) | --      |         |
| 6 – 11/12                          | 88.9<br>(40/45)  | --      |         | 58.8<br>(20/34)  | --      |         | 54.5<br>(30/55) | --      |         | 71.8<br>(56/78) | --      |         |
| ≥ 11/12                            | 85.0<br>(17/20)  |         |         | 75.0<br>(12/16)  |         |         | 66.7<br>(20/30) |         |         | 78.6<br>(33/42) |         |         |
| p-value <sub>AON</sub>             | 0.73             |         |         | 0.50             |         |         | 0.24            |         |         | 0.31            |         |         |
| p-value <sup>*</sup>               | 0.93             |         |         | 0.42             |         |         | 0.26            |         |         | 0.38            |         |         |
| p-value <sup>†</sup>               | 0.48             |         |         | 0.02             |         |         | 0.10            |         |         | 0.17            |         |         |
| p-value <sup>‡</sup>               | 0.26             |         |         | 0.14             |         |         | 0.31            |         |         | 0.39            |         |         |

AON, Age at type 1 diabetes onset

\* p-value for differences by gender among those diagnosed before 6 years of age

† p-value for differences by gender among those diagnosed at 6 - < 11 (boys) or 12 (girls) years of age

‡ p-value for differences by gender among those diagnosed at or after 11 (boys) or 12 (girls) years of age
